# Supplementary material for: Group IV compounds bearing a novel tridentate N-donor ligand: synthesis, structures and ethylene polymerization
Source: Royal Society of Chemistry journal article supplement (doi:10.1039/c6ra01365a), 2016-01-01
Supplement: c6ra01365a1.pdf [file c6ra01365a1.pdf]

## Group IV Compounds Bearing a Novel Tridentate N-donor Ligand: Synthesis, Structures and Ethylene Polymerization

Wei Li,<sup>b</sup> Feng Su,<sup>b</sup> Shifang Yuan,<sup>a</sup> Xine Duan,<sup>a</sup> Shengdi Bai<sup>a</sup> and Diansheng Liu,<sup>a,\*</sup>

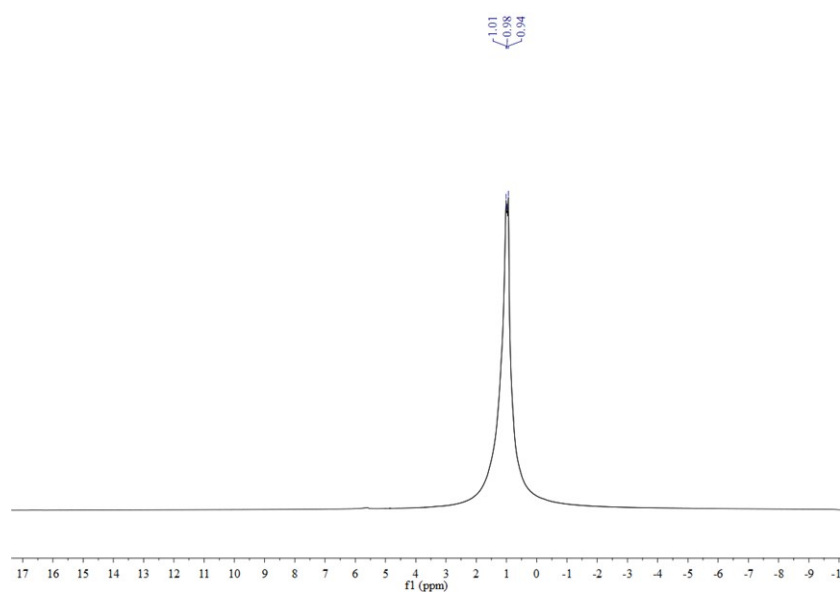

Fig. 1<sup>†</sup> <sup>1</sup>H NMR spectra of the PE sample obtained in entry 7 in Table 6.

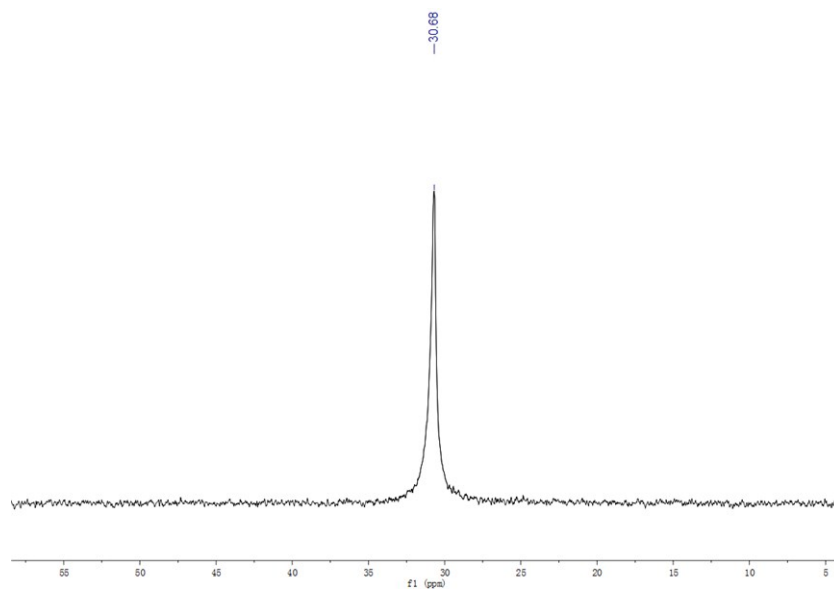

Fig. 2<sup>†</sup> <sup>13</sup>C NMR spectra of the PE sample obtained in entry 7 in Table 6.
